# Supplementary material for: Upfront Enzyme Replacement via Erythrocyte Transfusions for PNP Deficiency
Source: Springer Nature journal article supplement (doi:10.1007/s10875-021-01003-9), 2021-02-27

**Figure S1**

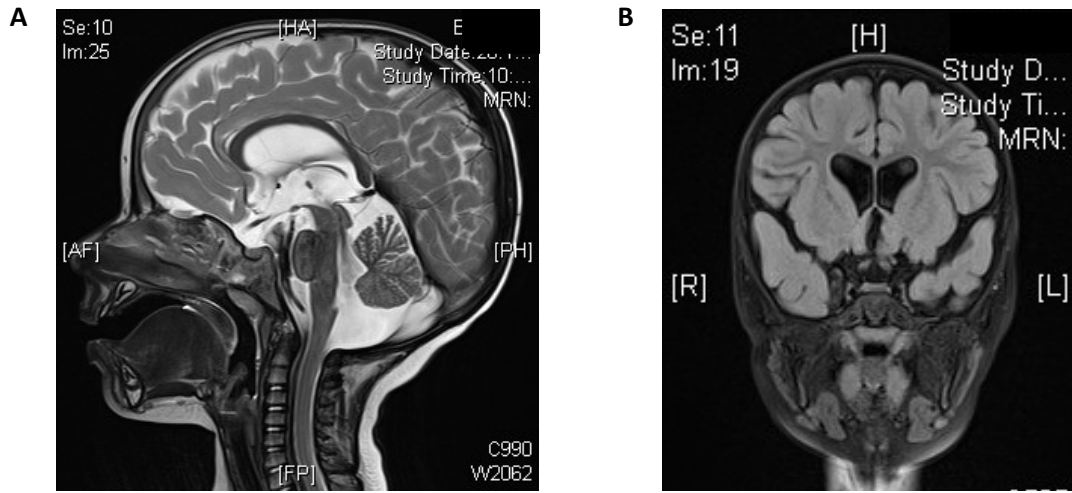

Figure S2

A

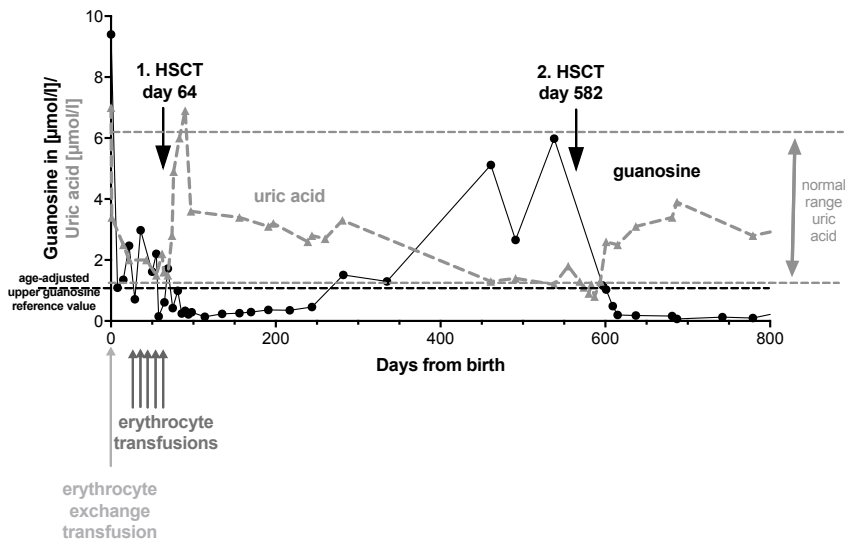

B

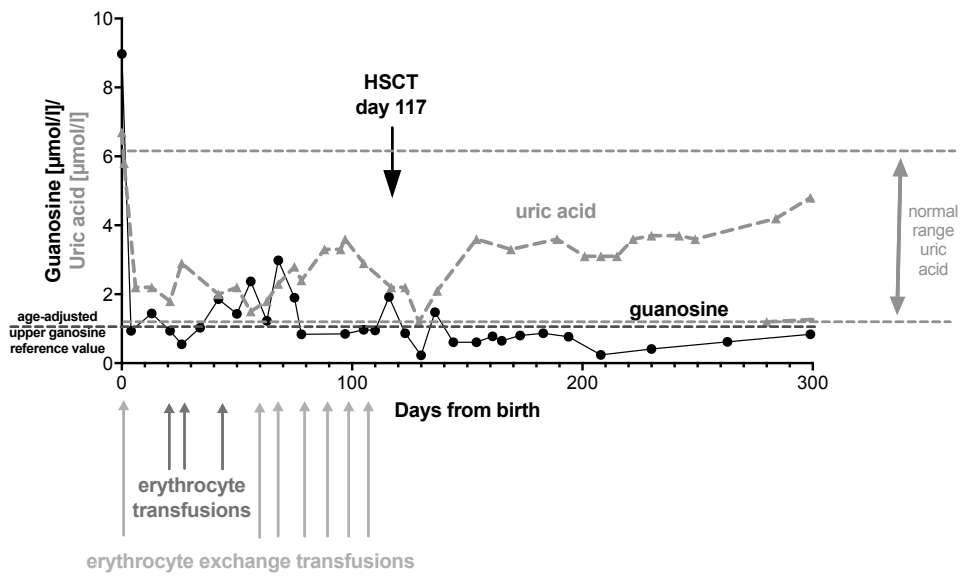

C

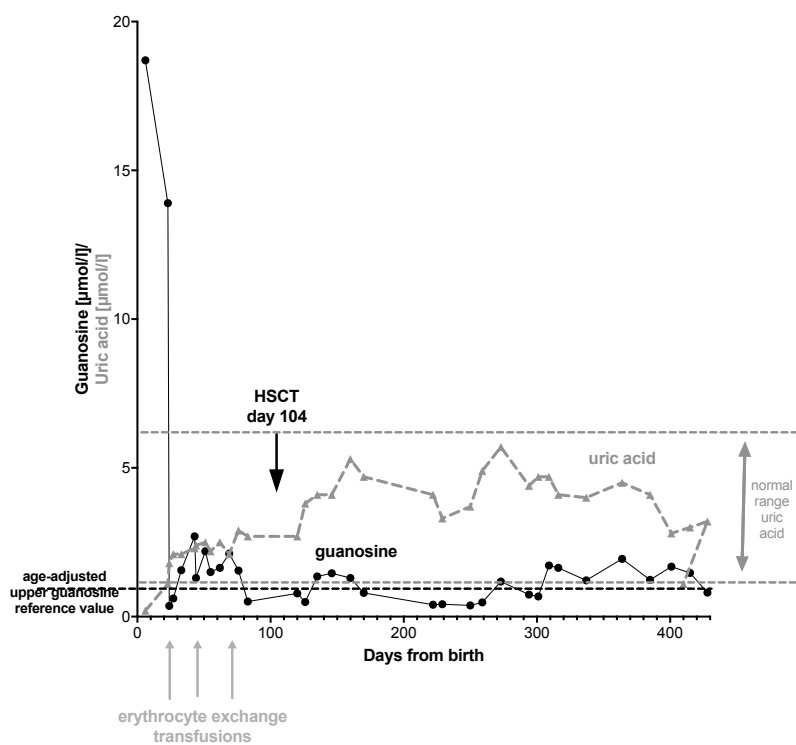

Supplement: MOESM2 [file 18910586]
